# Supplementary material for: From core–shell Ba0.4Sr0.6TiO3@SiO2 particles to dense ceramics with high energy storage performance by spark plasma sintering
Source: Royal Society of Chemistry journal article supplement (doi:10.1039/c7ta10821d), 2018-01-01
Supplement: c7ta10821d1.pdf [file c7ta10821d1.pdf]

## From core-shell $\text{Ba}_{0.4}\text{Sr}_{0.6}\text{TiO}_3@\text{SiO}_2$ particles to dense ceramics with high energy storage performance by spark plasma sintering

Yu Hui Huang<sup>a, b</sup>, Yong Jun Wu<sup>a, b, \*</sup>, Bing Liu<sup>a, b</sup>, Tian Nan Yang<sup>c</sup>, Jian Jun Wang<sup>c</sup>, Juan Li<sup>d</sup>, Long-Qing Chen<sup>c</sup>, Xiang Ming Chen<sup>a</sup>

a. Laboratory of Dielectric Materials, School of Materials Science and Engineering, Zhejiang University, Hangzhou 310027, China. \*E-mail: [yongjunwu@zju.edu.cn](mailto:yongjunwu@zju.edu.cn)

b. State Key Laboratory of Silicon Materials, Cyrus Tang Center for Sensor Materials and Applications, Innovation Center for Minimally Invasive Technique and Device, Zhejiang University, Hangzhou 310027, China

c. Department of Materials Science and Engineering, The Pennsylvania State University, University Park, Pennsylvania, 16802, United States

d. College of Materials Science and Engineering, Zhejiang University of Technology, Hangzhou 310006, China

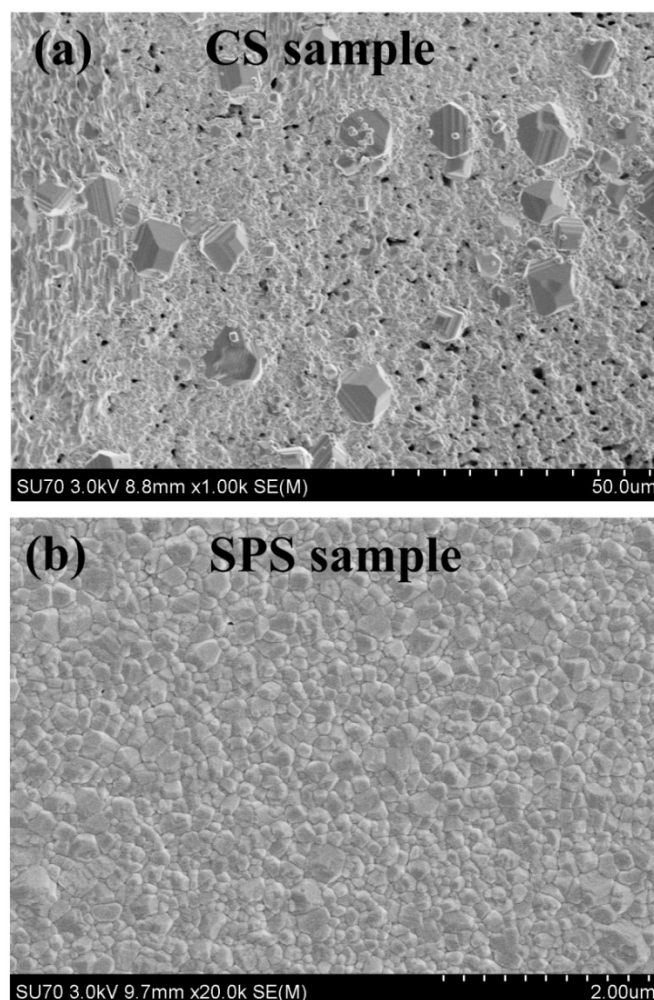

**Fig. S1.** SEM photos of BST ceramics prepared by (a) conventional sintering and (b) spark plasma sintering.

**Table S1(a)** Current research in Ba-based ceramics for energy storage application.

| Composition                                                                                                            | Breakdown strength (kV/cm) | Discharge                           |                     |      |
|------------------------------------------------------------------------------------------------------------------------|----------------------------|-------------------------------------|---------------------|------|
|                                                                                                                        |                            | energy density (J/cm <sup>3</sup> ) | year                | Ref. |
| <b>BST@SiO<sub>2</sub>-8</b>                                                                                           | <b>400</b>                 | <b>1.60</b>                         | <b>in this work</b> |      |
| BaZr <sub>0.1</sub> Ti <sub>0.9</sub> O <sub>3</sub>                                                                   | 30                         | 0.5                                 | 2017                | [1]  |
| Ba <sub>0.4</sub> Sr <sub>0.6</sub> TiO <sub>3</sub> +Al <sub>2</sub> O <sub>3</sub> -SiO <sub>2</sub>                 | 198.8                      | 0.564                               | 2017                | [2]  |
| BaTiO <sub>3</sub> +La <sub>2</sub> O <sub>3</sub> +SiO <sub>2</sub>                                                   | 136                        | 0.54                                | 2017                | [3]  |
| (Ba <sub>0.85</sub> Ca <sub>0.15</sub> )(Ti <sub>0.9</sub> Zr <sub>0.1</sub> )O <sub>3</sub>                           | 30                         | 0.52                                | 2016                | [4]  |
| Ba <sub>0.9995</sub> La <sub>0.0005</sub> TiO <sub>3</sub>                                                             | 300                        | 0.564                               | 2016                | [5]  |
| Ba <sub>0.95</sub> Ca <sub>0.05</sub> Zr <sub>0.3</sub> Ti <sub>0.7</sub> O <sub>3</sub>                               | 160                        | 0.59                                | 2016                | [6]  |
| BaTiO <sub>3</sub> -BiScO <sub>3</sub>                                                                                 | 120                        | 0.68                                | 2016                | [7]  |
| Ba <sub>0.4</sub> Sr <sub>0.6</sub> TiO <sub>3</sub> -0.5wt%SiO <sub>2</sub>                                           | 134                        | 0.86                                | 2016                | [8]  |
| BaTiO <sub>3</sub> +2.0wt%SiO <sub>2</sub>                                                                             | 200                        | 1.2                                 | 2015                | [9]  |
| BaTiO <sub>3</sub> +Al <sub>2</sub> O <sub>3</sub> -SiO <sub>2</sub>                                                   | 190                        | 0.725                               | 2015                | [10] |
| 0.88BaTiO <sub>3</sub> -0.12Bi(Mg <sub>1/2</sub> Ti <sub>1/2</sub> )O <sub>3</sub>                                     | 250                        | 1.81                                | 2015                | [11] |
| Ba <sub>0.4</sub> Sr <sub>0.6</sub> TiO <sub>3</sub>                                                                   | 197                        | 1.3                                 | 2015                | [12] |
| Ba <sub>0.4</sub> Sr <sub>0.6</sub> TiO <sub>3</sub>                                                                   | 90                         | 0.32                                | 2015                | [13] |
| (0.65BiFeO <sub>3</sub> -0.35BaTiO <sub>3</sub> )-3mol%Nb <sub>2</sub> O <sub>5</sub>                                  | 90                         | 0.71                                | 2014                | [14] |
| BaTiO <sub>3</sub> -SrTiO <sub>3</sub>                                                                                 | 47                         | 0.22                                | 2014                | [15] |
| Ba <sub>0.4</sub> Sr <sub>0.6</sub> TiO <sub>3</sub>                                                                   | 243                        | 1.28                                | 2014                | [16] |
| 0.9BaTiO <sub>3</sub> -0.1Bi(Mg <sub>2/3</sub> Nb <sub>1/3</sub> )O <sub>3</sub>                                       | 145                        | 1.13                                | 2014                | [17] |
| 0.85Ba(Zr <sub>0.2</sub> Ti <sub>0.8</sub> )O <sub>3</sub> -0.15(Ba <sub>0.7</sub> Ca <sub>0.3</sub> )TiO <sub>3</sub> | 170                        | 0.94                                | 2013                | [18] |
| Ba <sub>0.4</sub> Sr <sub>0.6</sub> TiO <sub>3</sub> +2.0wt% glass                                                     | 84                         | 0.44                                | 2012                | [19] |
| BaTiO <sub>3</sub> +7.0wt% glass                                                                                       | 90                         | 0.32                                | 2012                | [20] |
| BaTiO <sub>3</sub> -SrTiO <sub>3</sub>                                                                                 | 157                        | 1.16                                | 2011                | [21] |
| Ba <sub>0.4</sub> Sr <sub>0.6</sub> TiO <sub>3</sub> -30wt% MgO                                                        | 331                        | 1.14                                | 2010                | [22] |
| Ba <sub>0.4</sub> Sr <sub>0.6</sub> TiO <sub>3</sub> -5vol%(BaO-SiO <sub>2</sub> -B <sub>2</sub> O <sub>3</sub> )      | 200                        | 0.89                                | 2009                | [23] |

**Table S1(b)** Current research in Bi-based ceramics for energy storage application.

| Composition                                                                                                                                                              | Breakdown strength (kV/cm) | Discharge                           |      |      |
|--------------------------------------------------------------------------------------------------------------------------------------------------------------------------|----------------------------|-------------------------------------|------|------|
|                                                                                                                                                                          |                            | energy density (J/cm <sup>3</sup> ) | year | Ref. |
| 0.95(0.93Bi <sub>0.5</sub> Na <sub>0.5</sub> TiO <sub>3</sub> -0.07BaTiO <sub>3</sub> )-0.05KNbO <sub>3</sub>                                                            | 168                        | 1.72                                | 2017 | [24] |
| 0.4(Bi <sub>0.5</sub> Na <sub>0.5</sub> TiO <sub>3</sub> )-0.225BaTiO <sub>3</sub> -0.375BiFeO <sub>3</sub>                                                              | 80                         | 1.4                                 | 2017 | [25] |
| Bi <sub>0.5</sub> Na <sub>0.5</sub> TiO <sub>3</sub> -SrTiO <sub>3</sub> -NaNbO <sub>3</sub>                                                                             | 70                         | 0.73                                | 2017 | [26] |
| Bi <sub>0.5</sub> Na <sub>0.5</sub> TiO <sub>3</sub> -Ba <sub>0.85</sub> Ca <sub>0.15</sub> Ti <sub>0.85</sub> Zr <sub>0.1</sub> Sn <sub>0.05</sub> O <sub>3</sub> +MgO  | 189.7                      | 1.62                                | 2017 | [27] |
| 0.80Bi <sub>0.5</sub> Na <sub>0.5</sub> TiO <sub>3</sub> -0.20Bi <sub>0.5</sub> K <sub>0.5</sub> TiO <sub>3</sub> +BaZrO <sub>3</sub>                                    | 70                         | 0.73                                | 2016 | [28] |
| [(Bi <sub>0.5</sub> Na <sub>0.5</sub> ) <sub>0.93</sub> Ba <sub>0.07</sub> ] <sub>1-x</sub> La <sub>x</sub> Ti <sub>1-y</sub> Zr <sub>y</sub> O <sub>3</sub>             | 100                        | 1.21                                | 2016 | [29] |
| (1-x)(Na <sub>0.5</sub> Bi <sub>0.5</sub> )TiO <sub>3</sub> -xSrTiO <sub>3</sub>                                                                                         | 65                         | 0.65                                | 2016 | [30] |
| 0.92(Na <sub>1/2</sub> Bi <sub>1/2</sub> )TiO <sub>3</sub> -0.08BaTiO <sub>3</sub> +Bi(Mg <sub>1/2</sub> Ti <sub>1/2</sub> )O <sub>3</sub>                               | 135                        | 2.0                                 | 2016 | [31] |
| Bi <sub>0.5</sub> (Na <sub>0.82</sub> K <sub>0.18</sub> ) <sub>0.5</sub> TiO <sub>3</sub>                                                                                | 105                        | 1.41                                | 2016 | [32] |
| 0.55Bi <sub>0.5</sub> Na <sub>0.5</sub> TiO <sub>3</sub> -0.45Ba <sub>0.85</sub> Ca <sub>0.15</sub> Ti <sub>0.9-x</sub> Zr <sub>0.1</sub> Sn <sub>x</sub> O <sub>3</sub> | 130.2                      | 1.21                                | 2016 | [33] |
| 0.96[Bi <sub>0.5</sub> (Na <sub>0.84</sub> K <sub>0.16</sub> ) <sub>0.5</sub> Ti <sub>1-x</sub> Ta <sub>x</sub> O <sub>3</sub> ]-0.04SrTiO <sub>3</sub>                  | 50                         | 0.65                                | 2016 | [34] |
| 0.94Bi <sub>0.5</sub> Na <sub>0.5</sub> TiO <sub>3</sub> -0.06BaTiO <sub>3</sub> +CaZrO <sub>3</sub>                                                                     | 70                         | 0.7                                 | 2016 | [35] |
| Bi <sub>0.487</sub> Na <sub>0.427</sub> K <sub>0.06</sub> Ba <sub>0.026</sub> TiO <sub>3</sub> -xCeO <sub>2</sub>                                                        | 75                         | 0.94                                | 2016 | [36] |
| Bi <sub>0.5</sub> Na <sub>0.5</sub> TiO <sub>3</sub> -Ba <sub>0.85</sub> Ca <sub>0.15</sub> Ti <sub>0.9</sub> Zr <sub>0.1</sub> O <sub>3</sub> +MgO                      | 156.7                      | 1.04                                | 2016 | [37] |
| (Bi <sub>0.5</sub> Na <sub>0.5</sub> ) <sub>0.94</sub> Ba <sub>0.06</sub> Ti <sub>1-x</sub> (Al <sub>0.5</sub> Nb <sub>0.5</sub> ) <sub>x</sub> O <sub>3</sub>           | 70                         | 0.7                                 | 2016 | [38] |
| 0.85[Bi <sub>0.5</sub> Na <sub>0.5</sub> TiO <sub>3</sub> -BaTiO <sub>3</sub> ]-0.15Na <sub>0.73</sub> Bi <sub>0.09</sub> NbO <sub>3</sub>                               | 142                        | 1.4                                 | 2016 | [39] |
| (Bi <sub>0.5</sub> Na <sub>0.5</sub> )TiO <sub>3</sub> -(Bi <sub>0.5</sub> K <sub>0.5</sub> )TiO <sub>3</sub> -(K <sub>0.5</sub> Na <sub>0.5</sub> )NbO <sub>3</sub>     | 100                        | 1.2                                 | 2015 | [40] |
| Bi <sub>0.5</sub> Na <sub>0.5</sub> TiO <sub>3</sub> +NaNbO <sub>3</sub>                                                                                                 | 70                         | 0.71                                | 2015 | [41] |
| 0.93Bi <sub>0.5</sub> Na <sub>0.5</sub> TiO <sub>3</sub> -0.06BaTiO <sub>3</sub> -0.01K <sub>0.5</sub> Na <sub>0.5</sub> NbO <sub>3</sub>                                | 50                         | 0.598                               | 2015 | [42] |
| 0.89Bi <sub>0.5</sub> Na <sub>0.5</sub> TiO <sub>3</sub> -0.06BaTiO <sub>3</sub> -0.05K <sub>0.5</sub> Na <sub>0.5</sub> NbO <sub>3</sub>                                | 99                         | 0.9                                 | 2014 | [43] |
| (1-x)Bi <sub>0.47</sub> Na <sub>0.47</sub> Ba <sub>0.06</sub> TiO <sub>3</sub> -xKNbO <sub>3</sub>                                                                       | 100                        | 0.89                                | 2014 | [44] |
| [(Bi <sub>1/2</sub> Na <sub>1/2</sub> ) <sub>0.94</sub> Ba <sub>0.06</sub> ][La <sub>(1-x)</sub> Zr <sub>x</sub> TiO <sub>3</sub>                                        | 83.4                       | 1.58                                | 2014 | [45] |
| 0.89Bi <sub>0.5</sub> Na <sub>0.5</sub> TiO <sub>3</sub> -0.06BaTiO <sub>3</sub> -0.05K <sub>0.5</sub> Na <sub>0.5</sub> NbO <sub>3</sub>                                | 56                         | 0.59                                | 2011 | [46] |

**Table S1(c)** Current research in Pb-based ceramics for energy storage application.

| Composition                                                                                                                                                                                                                                                                 | Breakdown strength (kV/cm) | Discharge energy density (J/cm <sup>3</sup> ) | year | Ref. |
|-----------------------------------------------------------------------------------------------------------------------------------------------------------------------------------------------------------------------------------------------------------------------------|----------------------------|-----------------------------------------------|------|------|
| Pb <sub>0.97</sub> La <sub>0.02</sub> (Zr <sub>x</sub> Sn <sub>0.925-x</sub> Ti <sub>0.075</sub> )O <sub>3</sub>                                                                                                                                                            | 89.1                       | 2.35                                          | 2017 | [47] |
| (Pb <sub>0.94-x</sub> Ba <sub>x</sub> La <sub>0.04</sub> )(Zr <sub>0.7</sub> Sn <sub>0.3</sub> ) <sub>0.88</sub> Ti <sub>0.12</sub> ]                                                                                                                                       | 59                         | 0.9                                           | 2017 | [48] |
| Pb(Mg <sub>1/3</sub> Nb <sub>2/3</sub> )O <sub>3</sub> -PbTiO <sub>3</sub>                                                                                                                                                                                                  | 70                         | 0.47                                          | 2016 | [49] |
| Pb <sub>0.90</sub> La <sub>0.04</sub> Ba <sub>0.04</sub> [(Zr <sub>0.7</sub> Sn <sub>0.3</sub> ) <sub>0.88</sub> Ti <sub>0.12</sub> ]O <sub>3</sub>                                                                                                                         | 66.67                      | 0.74                                          | 2016 | [50] |
| (Pb <sub>0.97</sub> La <sub>0.02</sub> )(Zr <sub>0.5</sub> Sn <sub>0.5-x</sub> Ti <sub>x</sub> )O <sub>3</sub>                                                                                                                                                              | 158                        | 4.2                                           | 2016 | [51] |
| Pb <sub>0.99</sub> Nb <sub>0.02</sub> [(Zr <sub>0.60</sub> Sn <sub>0.40</sub> ) <sub>0.95</sub> Ti <sub>0.05</sub> ] <sub>0.98</sub> O <sub>3</sub>                                                                                                                         | 62                         | 0.73                                          | 2016 | [52] |
| (Pb <sub>0.87</sub> Ba <sub>0.1</sub> La <sub>0.02</sub> )(Zr <sub>0.65</sub> Sn <sub>0.3</sub> Ti <sub>0.05</sub> )O <sub>3</sub><br>+0.75mol%Y                                                                                                                            | 130                        | 2.75                                          | 2016 | [53] |
| La <sub>x</sub> Pb <sub>1-3x/2</sub> (Lu <sub>1/2</sub> Nb <sub>1/2</sub> )O <sub>3</sub>                                                                                                                                                                                   | 681                        | 3.85                                          | 2015 | [54] |
| (Pb <sub>0.87</sub> Ba <sub>0.1</sub> La <sub>0.02</sub> )(Zr <sub>0.68</sub> Sn <sub>0.24</sub> Ti <sub>0.08</sub> )O <sub>3</sub>                                                                                                                                         | 180                        | 3.2                                           | 2015 | [55] |
| (Pb <sub>0.858</sub> Ba <sub>0.1</sub> La <sub>0.02</sub> Y <sub>0.008</sub> )(Zr <sub>0.65</sub> Sn <sub>0.3</sub> Ti <sub>0.05</sub> )O <sub>3</sub><br>-(Pb <sub>0.97</sub> La <sub>0.02</sub> )(Zr <sub>0.9</sub> Sn <sub>0.05</sub> Ti <sub>0.05</sub> )O <sub>3</sub> | 306                        | 6.4                                           | 2015 | [56] |
| (Pb <sub>0.858</sub> Ba <sub>0.1</sub> La <sub>0.02</sub> Y <sub>0.008</sub> )(Zr <sub>0.65</sub> Sn <sub>0.3</sub> Ti <sub>0.05</sub> )O <sub>3</sub><br>-(Pb <sub>0.97</sub> La <sub>0.02</sub> )(Zr <sub>0.9</sub> Sn <sub>0.05</sub> Ti <sub>0.05</sub> )O <sub>3</sub> | 200                        | 4.65                                          | 2015 | [57] |
| (Pb <sub>0.925-x</sub> La <sub>0.05</sub> Ba <sub>x</sub> )(Zr <sub>0.52</sub> Sn <sub>0.39</sub> Ti <sub>0.09</sub> )O <sub>3</sub>                                                                                                                                        | 80                         | 0.7                                           | 2015 | [58] |
| Pb <sub>0.97</sub> La <sub>0.02</sub> (Zr <sub>0.58</sub> Sn <sub>0.335</sub> Ti <sub>0.085</sub> )O <sub>3</sub>                                                                                                                                                           | 86                         | 1.37                                          | 2015 | [59] |

## Reference

1. Y. Zhang, Y. Li, H. Zhu, Z. Fu, and Q. Zhang. *J. Mater. Sci. Mater. Electron.*, 2017, **28**,514.
2. B. Liu, X. Wang, R. Zhang, and L. Li. *J. Alloy. Compd.*, 2017, **691**, 619.
3. R. Ma, B. Cui, M. Shangguan, S. Wang, Y. Wang, Z. Chang, and Y. Wang. *J. Alloy. Compd.*, 2016, **690**, 438.
4. Z. Wang, J. Wang, X. Chao, L. Wei, B. Yang, D. Wang, and Z. Yang. *J. Mater. Sci. Mater. Electron.*, 2016, **27**, 5047.

5. V. S. Puli, D. K. Pradhan, S. Adireddy, M. Kothakonda, R. S. Katiyar, and D. B. Chrisey. *J. Alloy. Compd.*, 2016, **688**, 721.
6. D. Zhan, Q. Xu, D. P. Huang, H. X. Liu, W. Chen, and F. Zhang. *J. Alloy. Compd.*, 2016, **682**, 594.
7. L. Wu, X. Wang and L. Li. *J. Alloy. Compd.*, 2016, **688**, 113.
8. C. Diao, H. Liu, H. Hao, M. Cao, and Z. Yao. *Ceram. Int.*, 2016, **42**, 12639.
9. Y. Zhang, M. Cao, Z. Yao, Z. Wang, Z. Song, A. Ullah, H. Hao, and H. Liu. *Mater. Res. Bull.*, 2015, **67**, 70.
10. B. Liu, X. Wang, Q. Zhao, and L. Li. *J. Am. Ceram. Soc.*, 2015, **98**, 2641.
11. Q. Hu, L. Jin, T. Wang, C. Li, Z. Xing, and X. Wei. *J. Alloy. Compd.*, 2015, **640**, 416.
12. Z. Song, H. Liu, H. Hao, S. Zhang, M. Cao, Z. Yao, Z. Wang, W. Hu, Y. Shi, and B. Hu. *IEEE. T. Ultrason. Ferr.*, 2015, **62**, 609.
13. Y. Wang, Z. Y. Shen, Y. M. Li, Z. M. Wang, W. Q. Luo, and Y. Hong. *Ceram. Int.*, 2015, **41**, 8252.
14. T. Wang, L. Jin, Y. Tian, L. Shu, Q. Hu, and X. Wei. *Mater. Lett.*, 2014, **137**, 79.
15. L. Wu, X. Wang, H. Gong, Y. Hao, Z. Shen, and L. Li. *J. Mater. Chem. C.*, 2015, **3**, 750.
16. Z. Song, H. Liu, S. Zhang, Z. Wang, Y. Shi, H. Hao, M. Cao, Z. Yao, and Z. Yu. *J. Eur. Ceram. Soc.*, 2014, **34**, 1209.
17. T. Wang, L. Jin, C. Li, Q. Hu, and X. Wei. *J. Am. Ceram. Soc.*, 2015, **98**, 559.
18. V. S. Puli, D. K. Pradhan, D. B. Chrisey, M. Tomozawa, G. L. Sharma, J. F. Scott, and R. S. Katiyar. *J. Mater. Sci.*, 2013, **48**, 2151.
19. K. Chen, Y. Pu, N. Xu, and X. Luo. *J. Mater. Sci. Mater. Electron.*, 2012, **23**, 1599.
20. X. Wang, Y. Zhang, X. Song, Z. Yuan, T. Ma, Q. Zhang, C. Deng, and T. Liang. *J. Eur. Ceram. Soc.*, 2012, **32**, 559.
21. C. Sheng and F. Dogan. *Mater. Lett.*, 2011, **65**, 978.
22. Q. Zhang, L. Wang, J. Luo, Q. Tang, and D. Jun. *Int. J. Appl. Ceram. Tec.*, 2010, **7**, E124.
23. Q. Zhang, L. Wang, J. Luo, Q. Tang, and J. Du. *J. Am. Ceram. Soc.*, 2010, **92**, 1871.
24. Q. Xu, J. Xie, Z. He, L. Zhang, M. Cao, X. Huang, M. T. Lanagan, H. Hao, Z. Yao, and H. Liu. *J. Eur. Ceram. Soc.*, 2017, **37**, 99.
25. A. Mishra, B. Majumdar and R. Ranjan. *J. Eur. Ceram. Soc.*, 2017, **37**, 2379.
26. L. F. Z. J, B. Shen, X. Liu, K. Yang, Y. Zhang, P. Li, B. Liu, and H. Zeng. *J. Appl. Phys.*, 2017, **5**, 54103.
27. Y. Pu, M. Yao, L. Zhang, and M. Chen. *J. Alloy. Compd.*, 2017, **702**, 171 .
28. Q. Li, J. Wang, Z. Liu, G. Dong, and H. Fan. *J. Mater. Sci.*, 2016, **51**, 1153.
29. X. Lu, J. Xu, L. Yang, C. Zhou, Y. Y. Zhao, C. Yuan, Q. Li, G. Chen, and H. Wang. *Journal of Materiomics*, 2016, **2**, 87.
30. W. P. Cao, W. L. Li, X. F. Dai, T. D. Zhang, J. Sheng, Y. F. Hou, and W. D. Fei. *J. Eur. Ceram. Soc.*, 2015, **36**, 593.
31. P. Chen and B. Chu. *J. Eur. Ceram. Soc.*, 2016, **36**, 81.

32. Y. Zhao, J. Xu, L. Yang, C. Zhou, X. Lu, C. Yuan, Q. Li, G. Chen, and H. Wang. *J. Alloy. Compd.*, 2016, **666**, 209.
33. Y. Pu, M. Yao, L. Zhang, and P. Jing. *J. Alloy. Compd.*, 2016, **687**, 689.
34. R. A. Malik, A. Hussain, A. Maqbool, A. Zaman, T. K. Song, W. J. Kim, and M. H. Kim. Giant Strain, *J. Alloy. Compd.*, 2016, **682**, 302.
35. Q. Li, J. Wang, Y. Ma, L. Ma, G. Dong, and H. Fan. *J. Alloy. Compd.*, 2016, **663**, 701.
36. G. Liu, H. Fan, G. Dong, J. Shi, and Q. Chang. *J. Alloy. Compd.*, 2016, **664**, 632.
37. M. Yao, Y. Pu, H. Zheng, L. Zhang, M. Chen, and Y. Cui. *Ceram. Int.*, 2016, **42**, 8974.
38. Y. Zhao, J. Xu, C. Zhou, C. Yuan, Q. Li, G. Chen, H. Wang, and L. Yang. *Ceram. Int.*, 2016, **42**, 2221.
39. Q. Xu, M. T. Lanagan, X. Huang, J. Xie, L. Zhang, H. Hao, and H. Liu. *Ceram. Int.*, 2016, **42**, 9728.
40. J. Hao, Z. Xu, R. Chu, W. Li, J. Du, and F. Peng. *Solid State Commun.*, 2015, **204**, 19.
41. Q. Xu, T. Li, H. Hao, S. Zhang, Z. Wang, M. Cao, Z. Yao, and H. Liu. *J. Eur. Ceram. Soc.*, 2015, **35**, 545.
42. M. Chandrasekhar and P. Kumar. *Ceram. Int.*, 2015, **41**, 5574.
43. J. Ding, Y. Liu, Y. Lu, H. Qian, H. Gao, H. Chen, and C. Ma. *Mater. Lett.*, 2014, **114**, 107.
44. B. Wang, L. Luo, X. Jiang, W. Li, and H. Chen. *J. Alloy. Compd.*, 2014, **585**, 14.
45. Y. Wang, Z. Lv, H. Xie, and J. Cao. *Ceram. Int.*, 2014, **40**, 4323.
46. F. Gao, X. Dong, C. Mao, W. Liu, H. Zhang, L. Yang, F. Cao, and G. Wang. *J. Am. Ceram. Soc.*, 2011, **94**, 4382.
47. Z. Liu, Y. Bai, X. Chen, X. Dong, H. Nie, F. Cao, and G. Wang. *J. Alloy. Compd.*, 2017, **691**, 721.
48. R. Xu, Q. Zhu, J. Tian, Y. Feng, and Z. Xu. *Ceram. Int.*, 2016, **43**, 2481.
49. T. F. Zhang, X. G. Tang, Q. X. Liu, Y. P. Jiang, X. X. Huang, and Q. F. Zhou. *J. Phys. D. Appl. Phys.*, 2016, **49**, 95302.
50. R. Xu, Z. Xu, Y. Feng, H. He, J. Tian, and D. Huang. *J. Am. Ceram. Soc.*, 2016, **99**, 2984.
51. X. Wang, J. Shen, T. Yang, Y. Dong, and Y. Liu. *J. Alloy. Compd.*, 2016, **655**, 309.
52. X. Chen, Z. Liu, C. Xu, F. Cao, G. Wang, and X. Dong. *AIP Adv.*, 2016, **6**, 593.
53. L. Zhang, S. Jiang, Y. Zeng, M. Fu, K. Han, Q. Li, Q. Wang, and G. Zhang. *Ceram. Int.*, 2014, **40**, 5455.
54. X. Yang, Y. Liu, C. He, H. Taylor, and X. Long. *J. Eur. Ceram. Soc.*, 2015, **35**, 4173.
55. G. Zhang, D. Zhu, X. Zhang, L. Zhang, J. Yi, B. Xie, Y. Zeng, Q. Li, Q. Wang, and S. Jiang. *J. Am. Ceram. Soc.*, 2015, **98**, 1175.
56. L. Zhang, S. Jiang, B. Fan, and G. Zhang. *J. Alloy. Compd.*, 2015, **622**, 162.
57. L. Zhang, S. Jiang, B. Fan, and G. Zhang. *J. Alloy. Compd.*, 2015, **41**, 1139.
58. Q. Zhang, X. Liu, Y. Zhang, X. Song, J. Zhu, I. Baturin, and J. Chen. *Ceram. Int.*,

2015, **41**, 3030.

59. Z. Liu, X. Chen, W. Peng, C. Xu, X. Dong, F. Cao, and G. Wang. *Appl. Phys. Lett.*, 2015, **106**, 15.
